# Supplementary material for: Maternal obesity blunts antimicrobial responses in fetal monocytes
Source: eLife. 2023 Jan 16;12:e81320. doi: 10.7554/eLife.81320 (PMC9894585; doi:10.7554/eLife.81320)
Supplement: Supplementary file 1. [file elife-81320-supp1.xlsx]

## Sheet: Maob_Lean_Obese_UCB_Clusterprop
	Obese1	Obese2	Obese3	Obese4	Lean1	Lean2	Lean3	Lean4
Classical Monos	22.96	13.9714	7.72059	7.57856	16.4948	41.517	27.2834	27.47
Naive CD4	27.6871	40.8723	41.7112	42.1442	37.3978	23.0121	18.6573	22.125
Memory CD4	5.57119	15.0907	12.3997	10.536	14.113	12.2023	19.516	11.9534
B cells	18.0642	7.02431	8.85695	8.44116	7.46534	8.13485	12.3341	16.035
Naive CD8	14.6877	10.9996	19.6858	14.4177	13.722	4.36057	2.88837	5.99287
Classical Monos (cytokine)	0.168824	0.0385951	0	0.308071	1.70636	0.10993	10.0703	7.15905
CM CD4	2.47608	3.04902	3.17513	1.47874	3.80377	0.732869	1.13193	2.29997
Memory CD8	0.112549	1.85257	2.40642	0	1.17312	3.6277	1.87354	1.069
NK cells	1.40687	2.3543	1.06952	1.23229	1.35087	0.879443	1.48322	1.45773
Erythroid	4.27687	0.192976	0.334225	6.40789	0.106648	1.06266	0.117096	0.226757
Non-classical Monos	1.12549	1.50521	0.434492	1.7252	0.0710985	0.916086	2.30289	1.069
Dead cells	0.450197	0.849093	0.835561	0.739372	1.52862	0.806156	0.78064	0.809848
Prolif cells	0.337648	0.424547	0.334225	4.49784	0.426591	1.42909	0.234192	0.421121
cDCs	0.619021	1.15785	0.534759	0.369686	0.355492	1.13595	0.9758	1.19857
pDCs	0.0562746	0.617522	0.501337	0.123229	0.284394	0.0732869	0.351288	0.712666
