# Supplementary figures and images for: Maternal obesity blunts antimicrobial responses in fetal monocytes
Source: eLife journal article supplement (doi:10.7554/elife.81320), 2023-01-16

Figure 2 - Figure Supplement 1

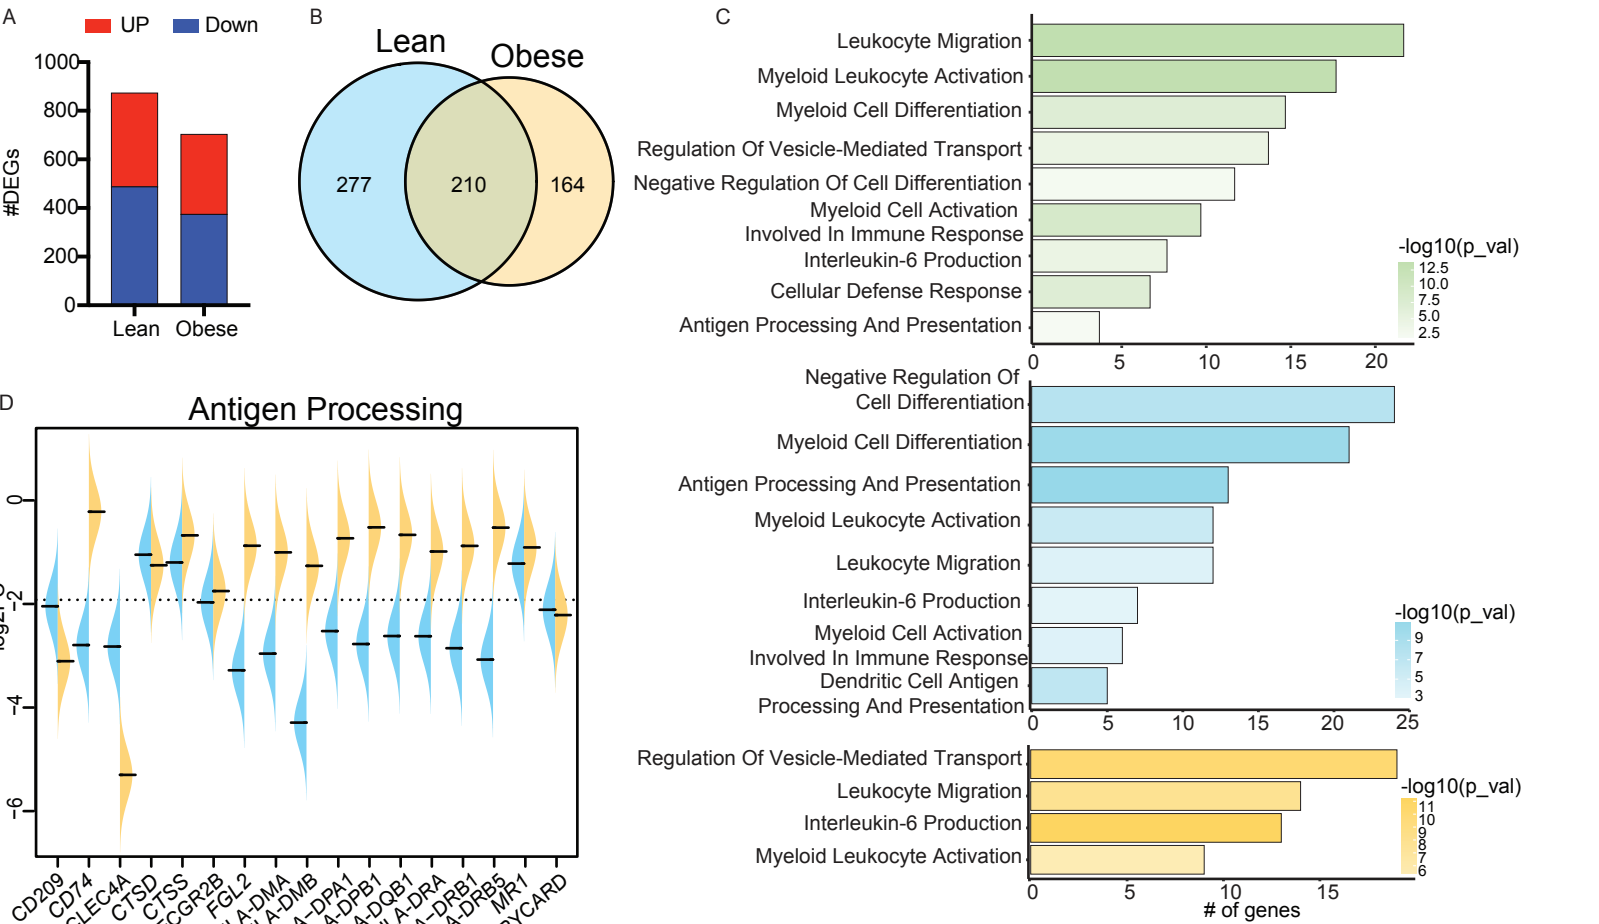

Supplement: supp [file elife-81320-supp-v1.zip]

Figure 1 - Figure Supplement 3

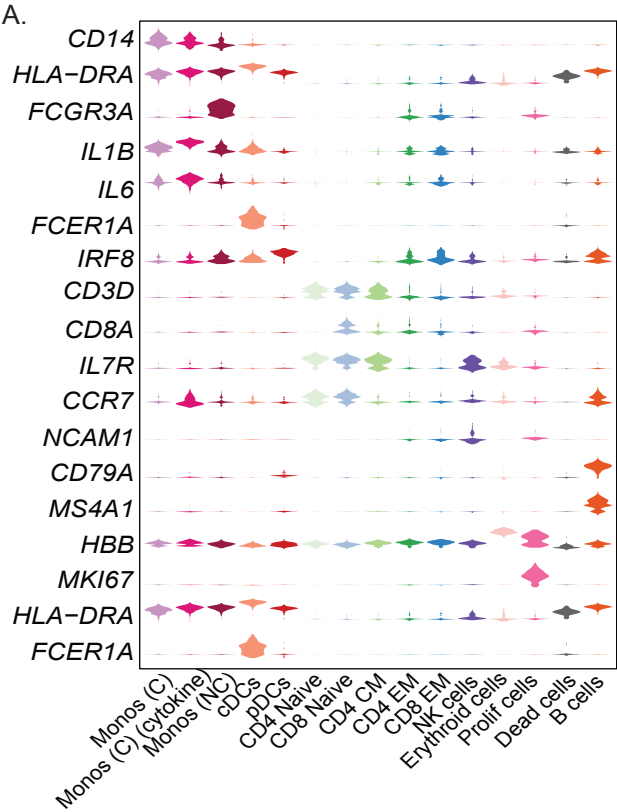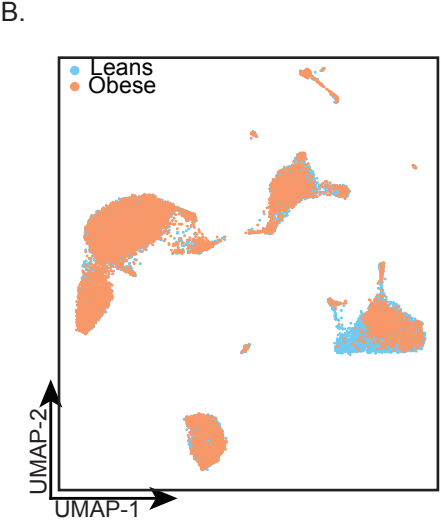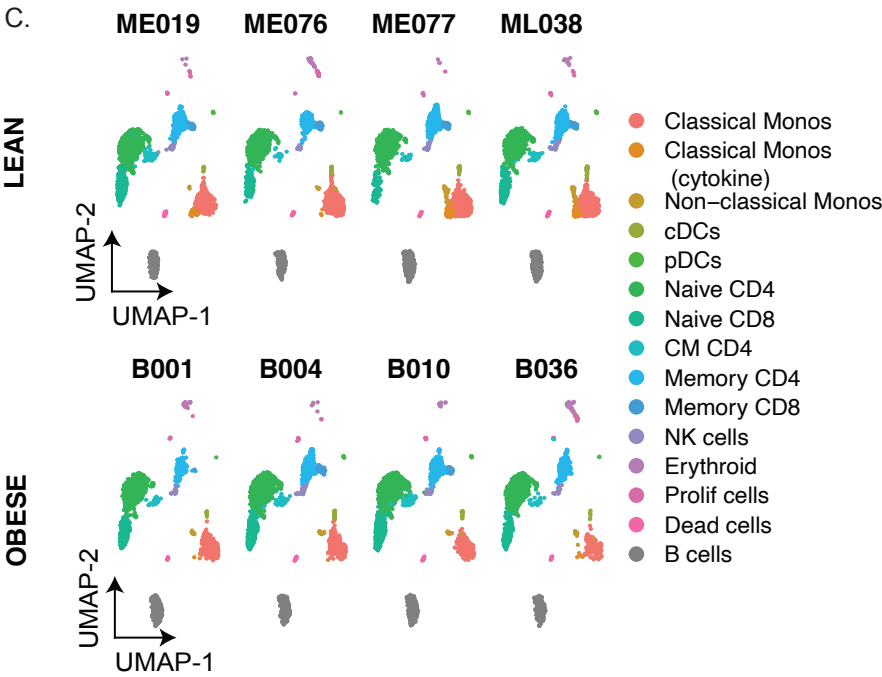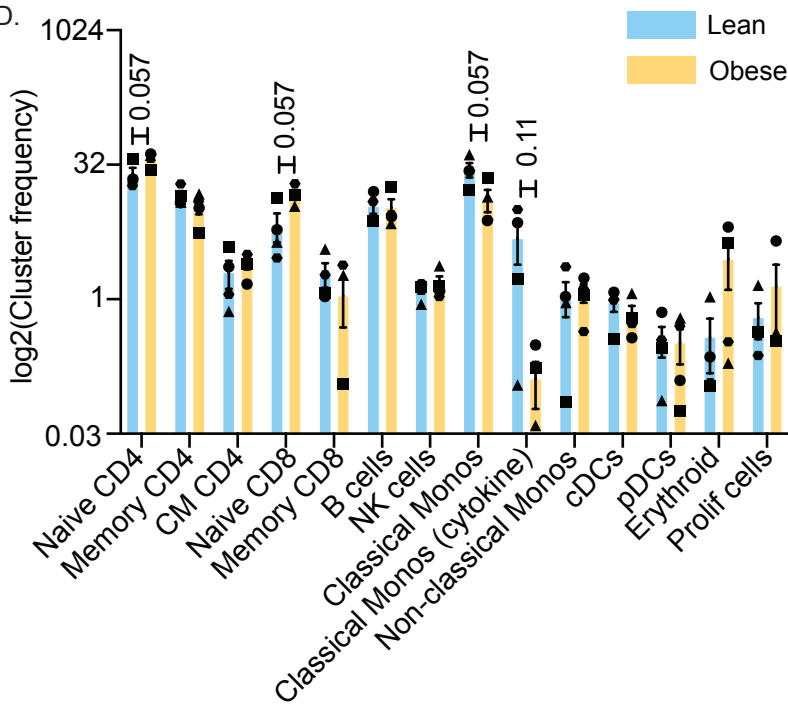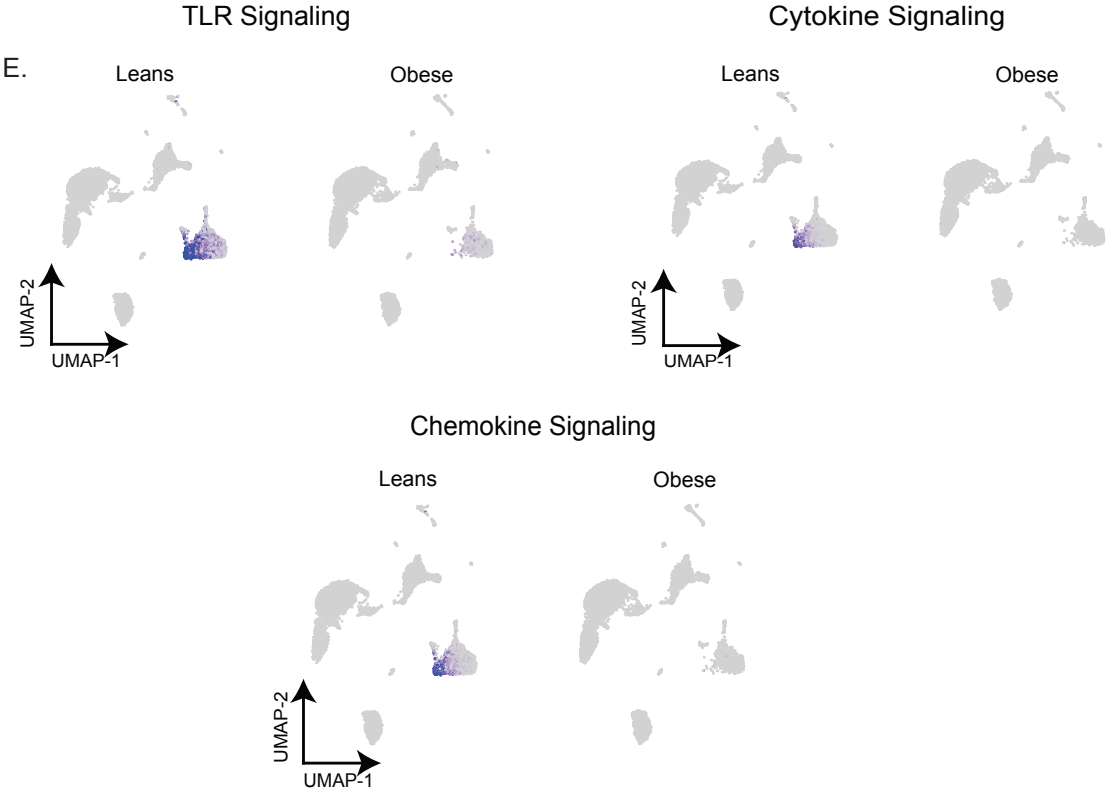

Supplement: supp [file elife-81320-supp-v1.zip]

Figure 5 - Figure Supplement 1

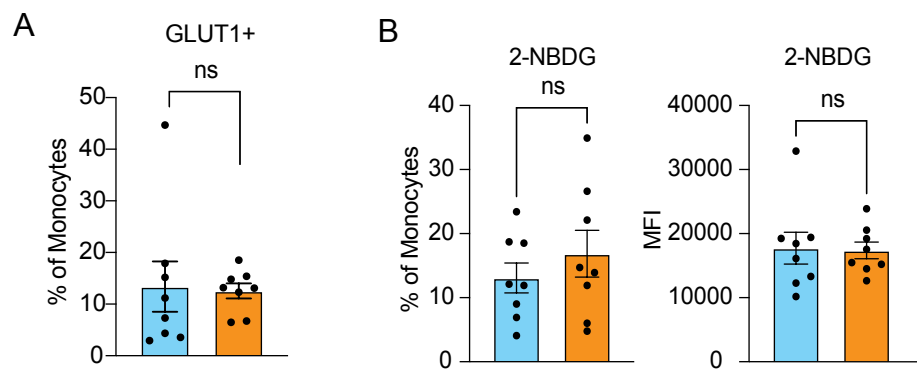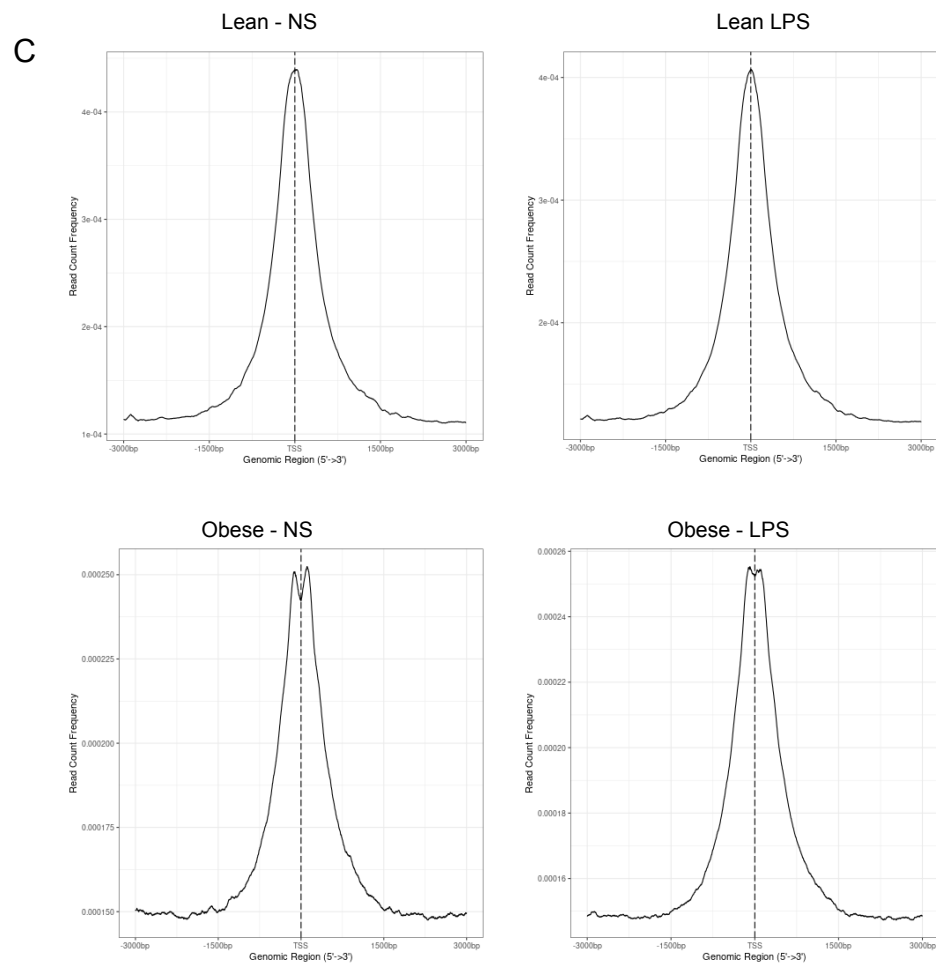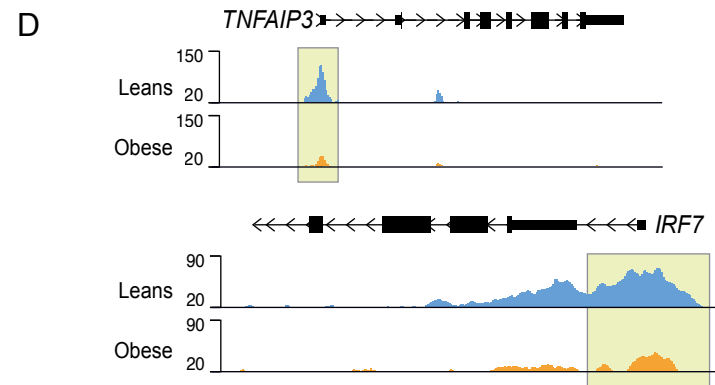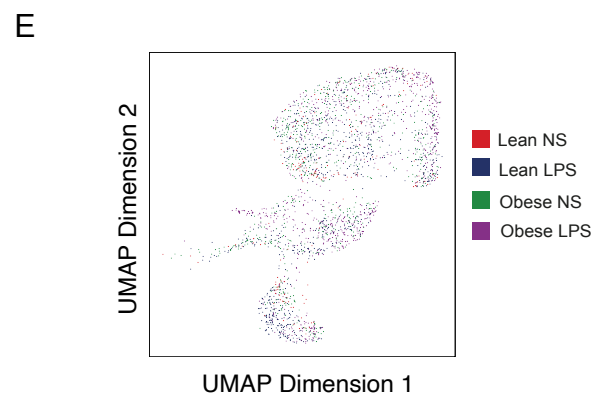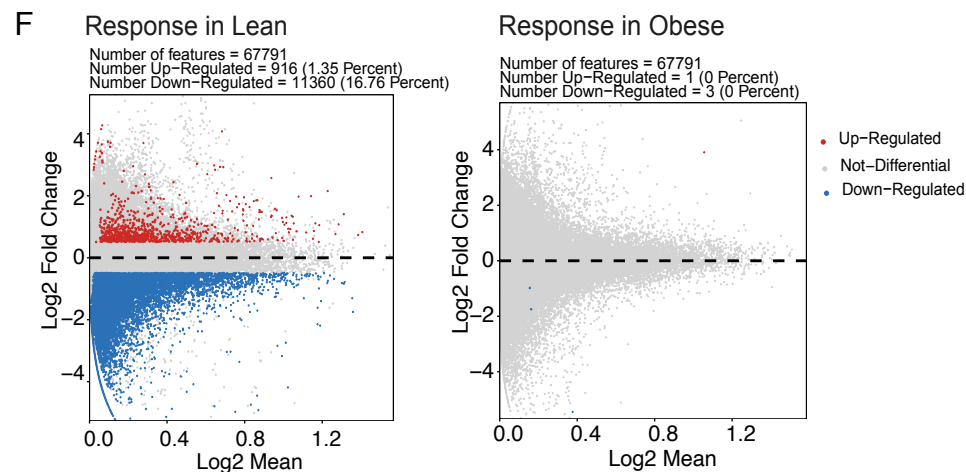

Supplement: supp [file elife-81320-supp-v1.zip]

Figure 3 - Figure Supplement 1

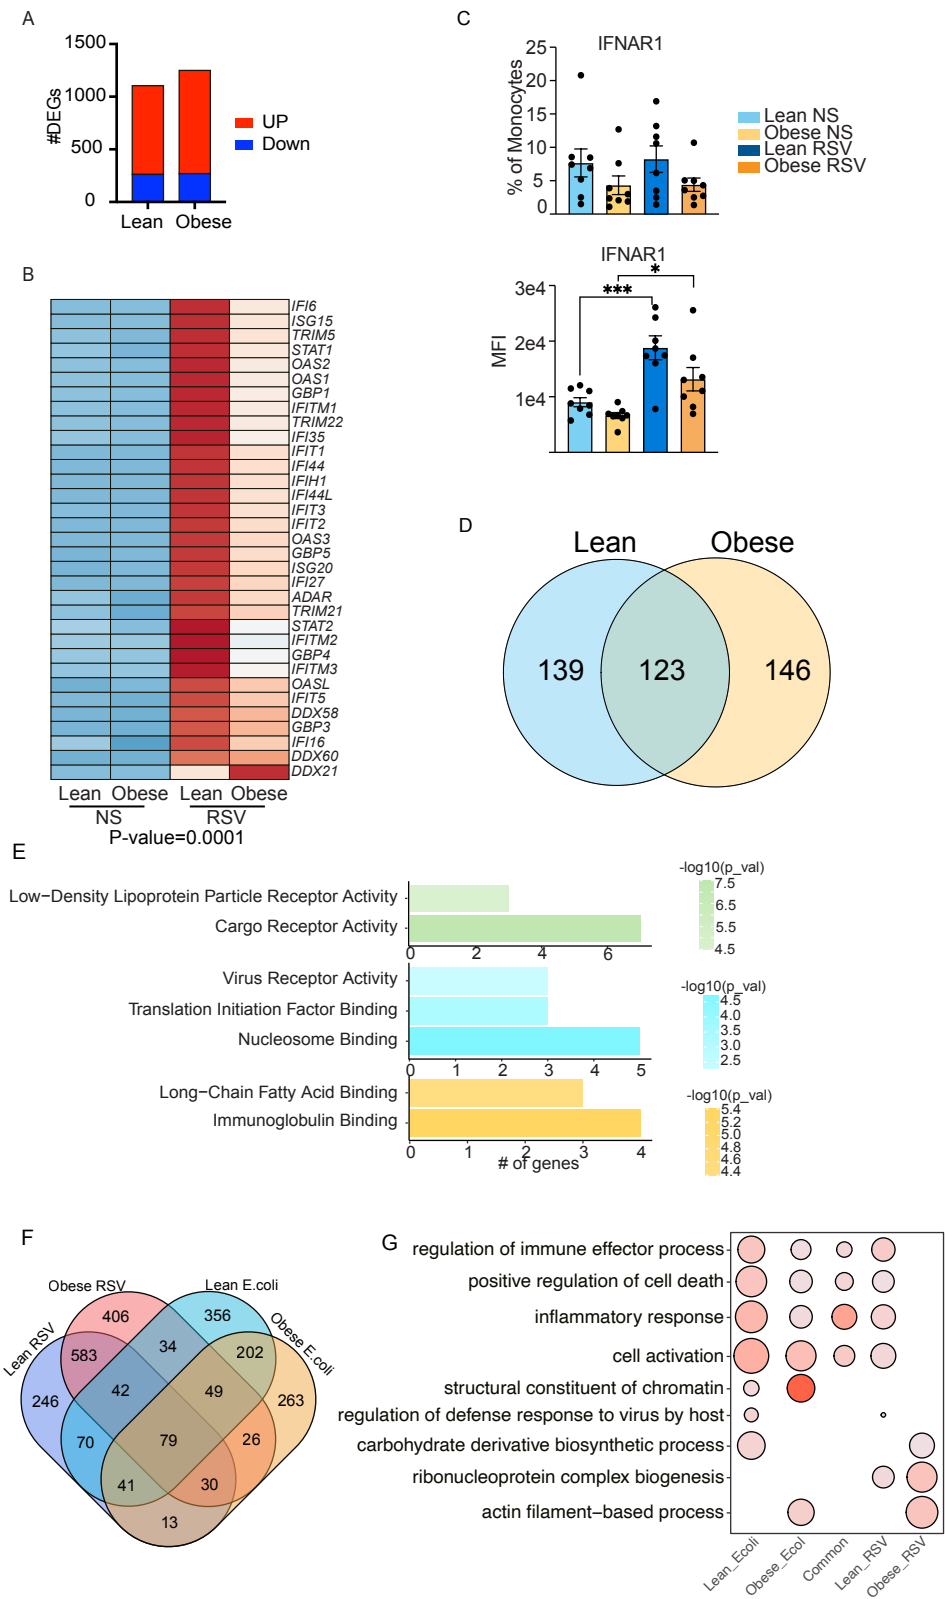

Supplement: supp [file elife-81320-supp-v1.zip]

Figure 1 – Figure Supplement 2

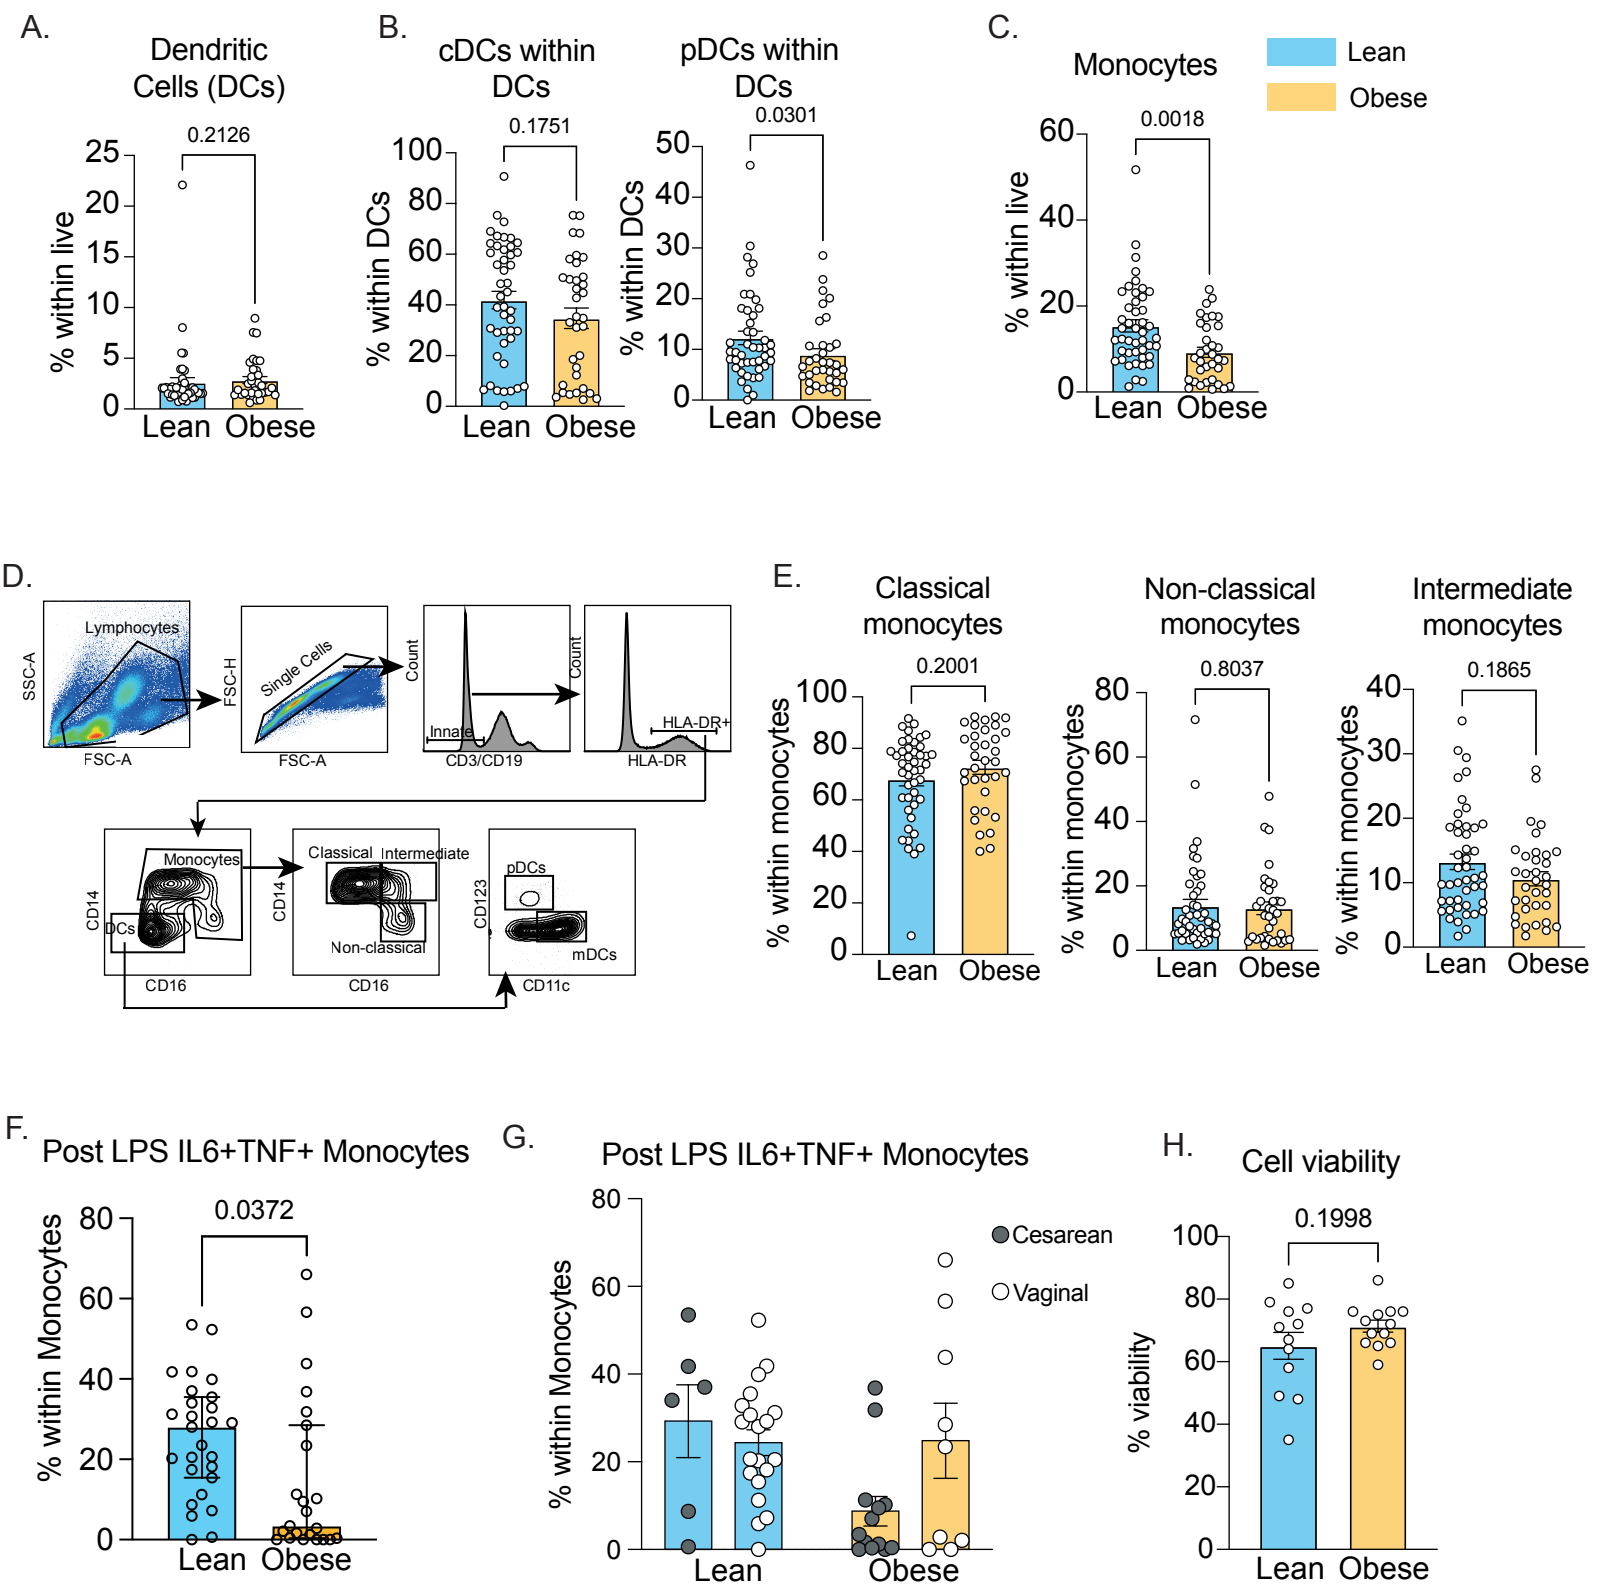

Supplement: supp [file elife-81320-supp-v1.zip]

Figure 1 - Figure Supplement 1

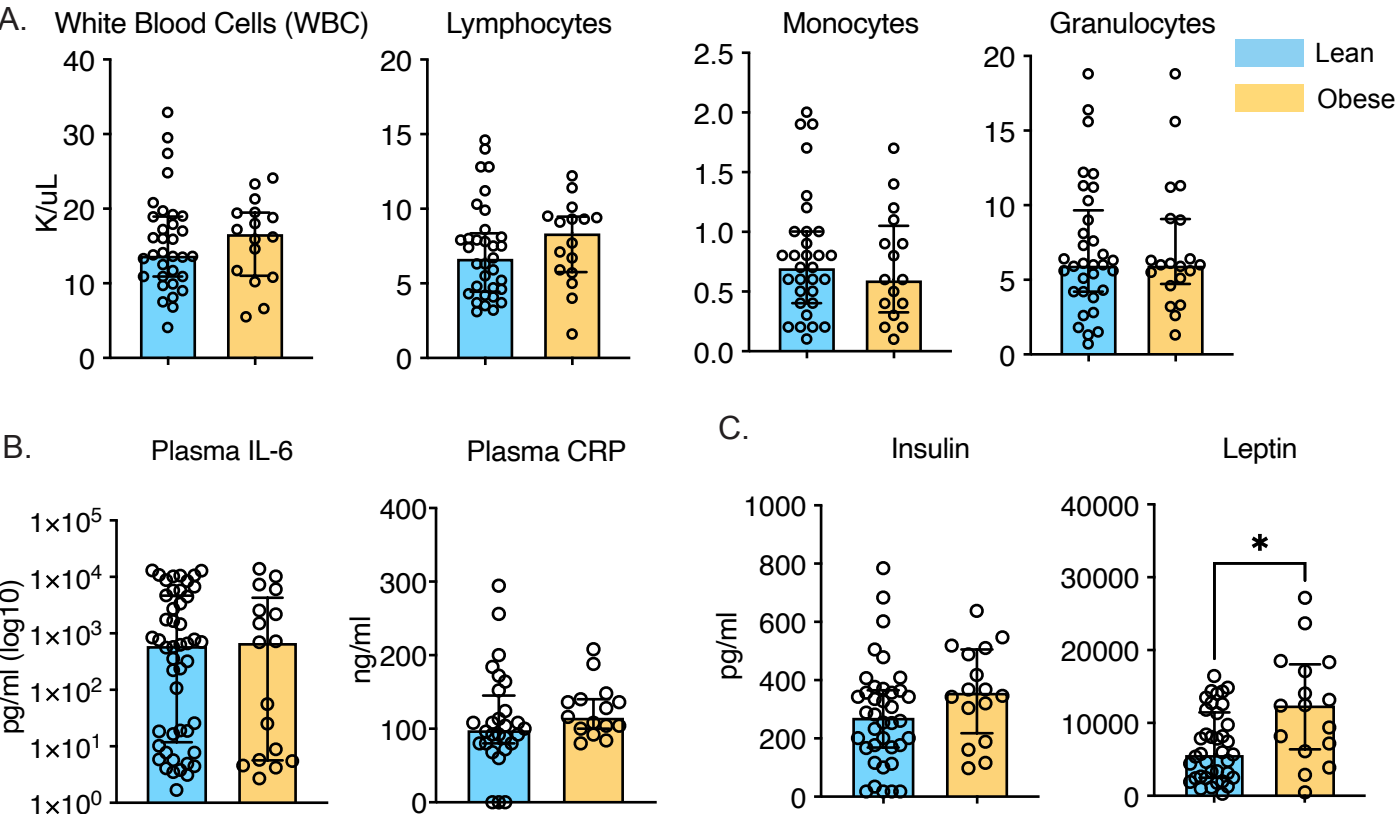

Supplement: supp [file elife-81320-supp-v1.zip]
